# Supplementary material for: Biosynthesis of Silver Nanoparticles Using Salvia pratensis L. Aerial Part and Root Extracts: Bioactivity, Biocompatibility, and Catalytic Potential
Source: MDPI journal article supplement (doi:10.3390/molecules28031387), 2023-02-01
Supplement: s1 [file s1]

## Supplementary Material

*Article*

# **Biosynthesis of Silver Nanoparticles Using *Salvia pratensis* L. Aerial Part and Root Extracts: Bioactivity, Biocompatibility, and Catalytic Potential**

<sup>1</sup> University of Kragujevac, Faculty of Science, Department of Chemistry, Radoja Domanovića 12, 34000 Kragujevac, Serbia

<sup>2</sup> University of Belgrade, Faculty of Physical Chemistry, Studentski Trg 12-16, 11159 Belgrade, Serbia

<sup>3</sup> University of Naples Federico II, Department of Chemical Sciences, Complesso Universitario Monte Sant'Angelo, via Cinthia 4, 80126 Naples, Italy

<sup>4</sup> eLoop S.r.l., V.le A, Gramsci 17/B, 80122 Napoli, Italy

<sup>5</sup> Mining and Metallurgy Institute Bor, Zeleni Bulevar 35, 19210 Bor, Serbia

<sup>6</sup> University of Kragujevac, Institute for Information Technologies Kragujevac, Department of Science, Jovana Cvijića bb, 34000 Kragujevac, Serbia

\* Correspondence: nikola.sreckovic@pmf.kg.ac.rs (N.Z.S.); vladimir.mihailovic@pmf.kg.ac.rs (V.B.M.)

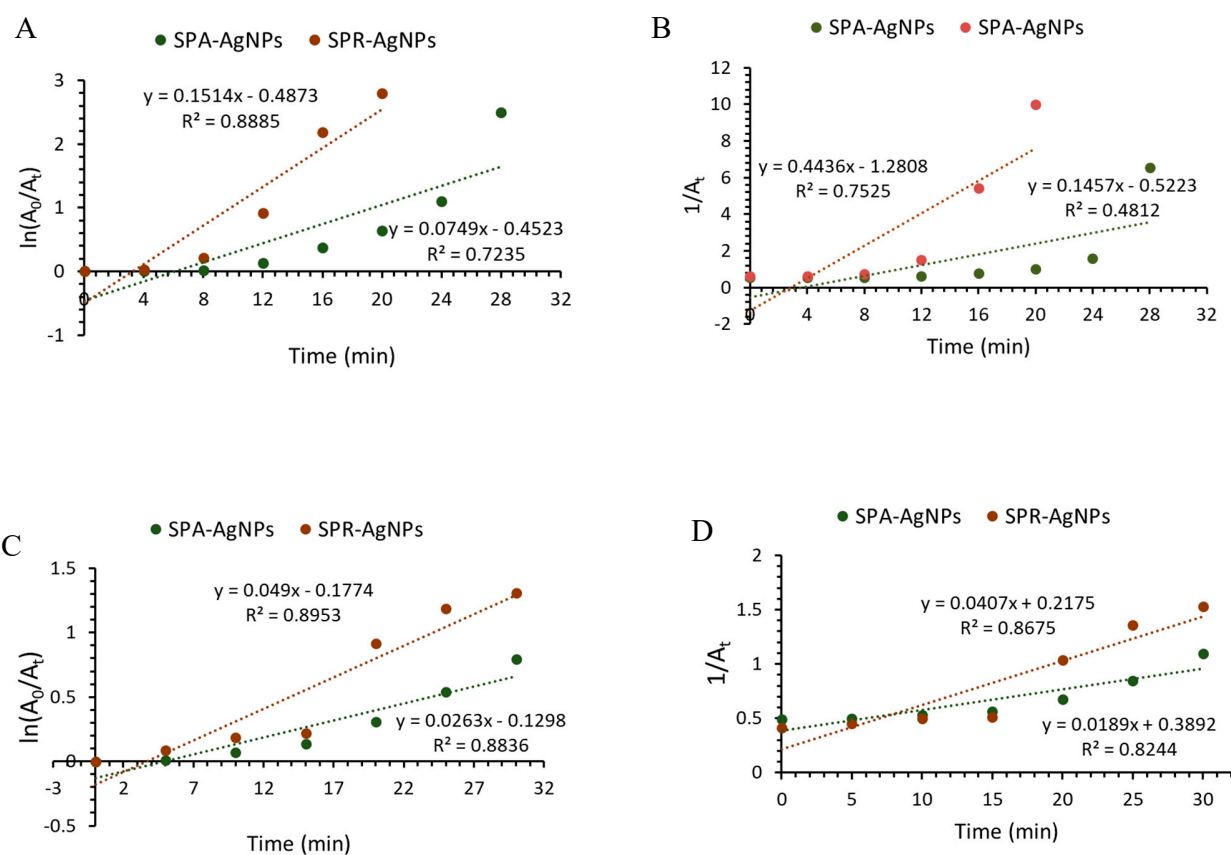

**Figure S1.** Pseudo-first-order and pseudo-second-order reaction kinetics linear models for Congo red (A and B) and 4-nitrophenol (C and D) degradation kinetic using synthesized silver nanoparticles (SPA-AgNPs and SPR-AgNPs) and  $\text{NaBH}_4$
